# Supplementary material
Source: PubMed Central journal article supplement (PMC8285925)
Supplement: NIHMS1716703-supplement-Supplementary_Table_1.pdf [file NIHMS1716703-supplement-Supplementary_Table_1.pdf]

**Supplementary Table 1.** Cross classification of pre and post RCM levels of confidence, categorized as Low (scored 0-3), medium (4-6) and high (7-10).

| Pre-RCM Confidence | Post RCM Confidence | n   | %     |
|--------------------|---------------------|-----|-------|
| Low                | Low                 | 2   | 0.74  |
| Low                | Medium              | 7   | 2.57  |
| Low                | High                | 4   | 1.47  |
| Medium             | Low                 | 0   | 0     |
| Medium             | Medium              | 21  | 7.72  |
| Medium             | High                | 113 | 41.54 |
| High               | Low                 | 3   | 1.11  |
| High               | Medium              | 8   | 2.94  |
| High               | High                | 114 | 41.91 |
| TOTAL              |                     | 272 | 100   |
